# Supplementary material for: Large-Scale Non-Targeted Metabolomics Reveals Antioxidant, Nutraceutical and Therapeutic Potentials of Sorghum
Source: MDPI journal article supplement (doi:10.3390/antiox10101511), 2021-09-23
Supplement: s1 [file s1]

## Supplementary Information

Title of the paper: “Large scale non targeted metabolomics reveals anti-oxidant, nutraceutical and therapeutic potentials of Sorghum”

### Supplementary Figure S1: GC-MS/MS acquired peak data processing and annotation using MS-DIAL

Raw data from GC-MS/MS analysis

↓ Using *Reifycs* Abf Converter

Raw file converted to .abf format

↓ Ionization type: Soft, separation type : chromatography, Ion mode: Positive  
MS method type : data dependent MS/MS, MS1 & MS2 : Centroid

Created an project by importing the .abf files into MS-DIAL

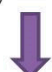

Peak data processing and annotation using MS-DIAL

- MS1 tolerance : 0.01 Da
- MS2 tolerance : 0.025 Da
- Minimum peak height : 1000 amplitude
- Mass slice width : 0.1 Da
- Sigma window value : 0.5
- .msp files from MoNA used for annotation

↓ Data filtering, normalization and scaling

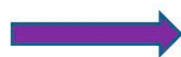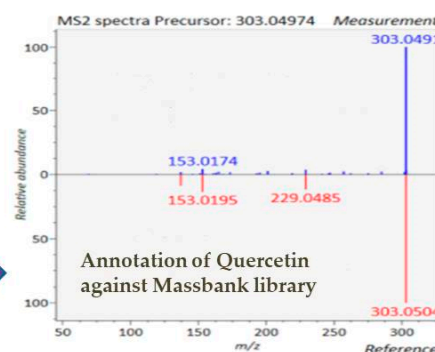

Peak masses and its area intensities were used for further statistical analysis using MetaboAnalyst 5.0

**Supplementary figure for the article entitled “Large scale non targeted metabolomics reveals anti-oxidant, nutraceutical and therapeutic potentials of Sorghum”**

**Supplementary Figure S2: GC-MS/MS derived chromatograms of sorghum grains differing in grain color**

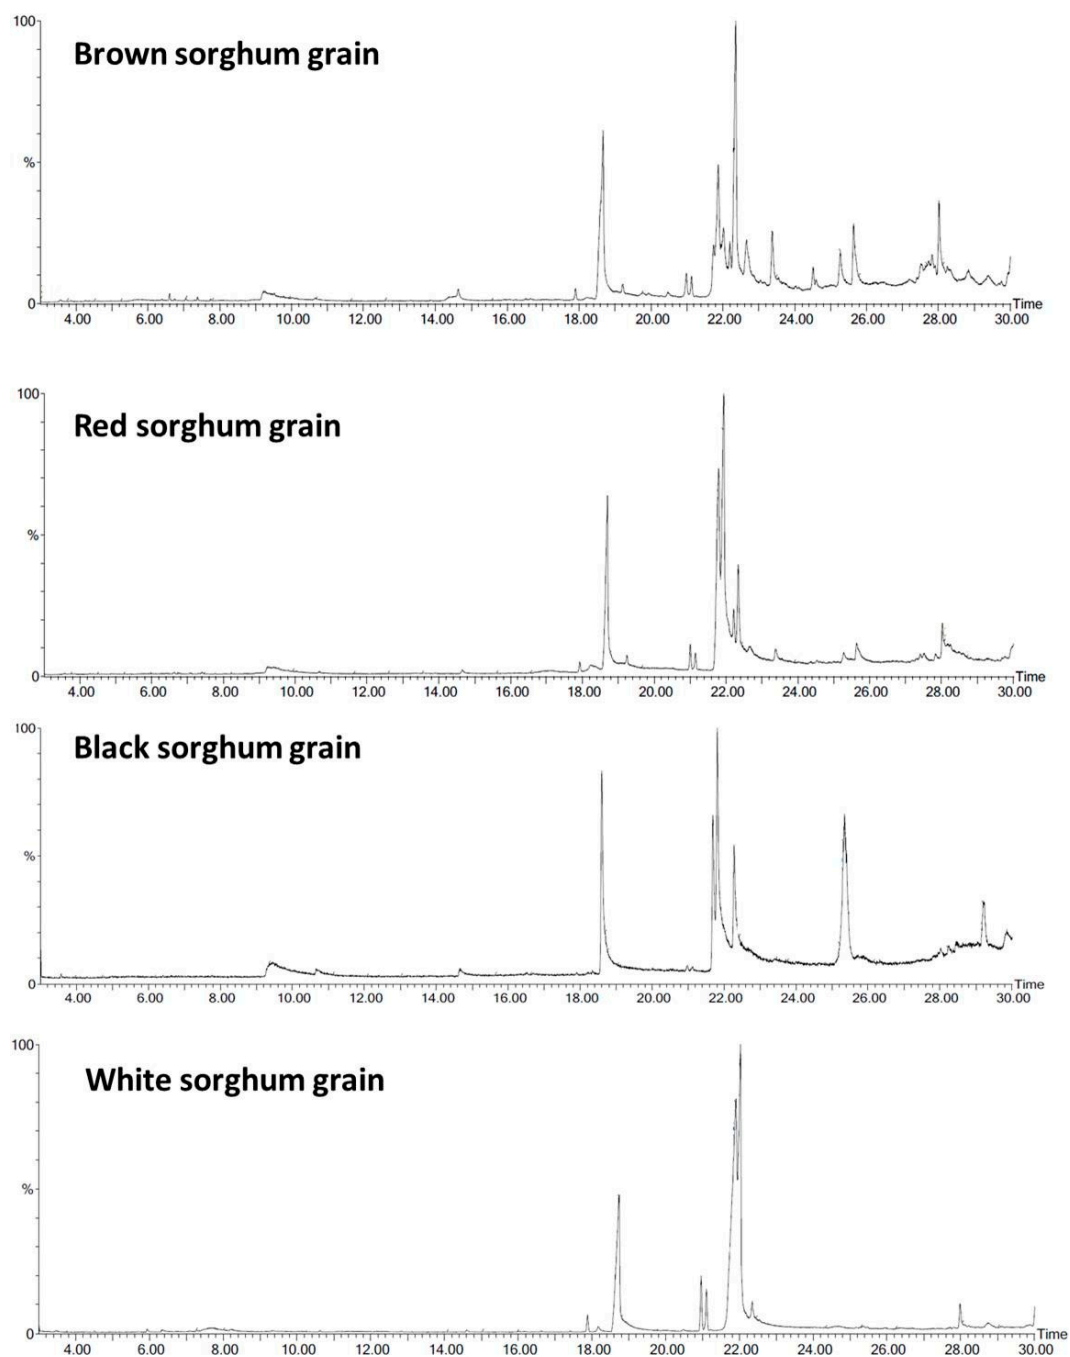

**Supplementary tables for the article entitled “Large scale non targeted metabolomics reveals anti-oxidant, nutraceutical and therapeutic potentials of Sorghum”**

**Supplementary Table S1: Details of sorghum accessions used (grain color descriptor, origin and type)**

| <b>Accessions</b> | <b>RHS Color grade</b> | <b>Color descriptor</b> | <b>Origin</b> | <b>Type</b> |
|-------------------|------------------------|-------------------------|---------------|-------------|
| IS 7748           | Greyed orange - 164A   | Brown                   | Nigeria       | Tropical    |
| IS 7777           | Greyed orange 164B     | Brown                   | Nigeria       | Tropical    |
| IS 7877           | White- 155A            | White                   | Nigeria       | Tropical    |
| IS 8028           | Greyed orange - 165B   | Red                     | Japan         | Temperate   |
| IS 8569           | Greyed orange - 165A   | Red                     | Chad          | Tropical    |
| IS 8688           | White- 155B            | White                   | Sudan         | Tropical    |
| IS 8826           | Black- 203A            | Black                   | Kenya         | Tropical    |
| IS 8834           | White- 155A            | White                   | Kenya         | Tropical    |
| IS 8962           | Greyed orange - 166B   | Red                     | Kenya         | Tropical    |
| IS 9094           | Greyed orange- 165B    | Red                     | Kenya         | Tropical    |
| IS 9108           | Greyed orange - 165B   | Red                     | Kenya         | Tropical    |
| IS 9185           | Greyed orange - 165B   | Red                     | South Africa  | Temperate   |
| IS 9262           | Greyed orange - 166B   | Red                     | Uganda        | Tropical    |
| IS 9378           | Greyed orange - 164A   | Brown                   | South Africa  | Temperate   |
| IS 9442           | Greyed orange - 164A   | Brown                   | South Africa  | Temperate   |
| IS 9789           | Greyed orange - 164B   | Brown                   | Sudan         | Tropical    |
| IS 9912           | White- 155B            | White                   | Sudan         | Tropical    |
| IS 9991           | White- 155D            | White                   | Sudan         | Tropical    |
| IS 10372          | White-155B             | White                   | Israel        | Tropical    |
| IS 10634          | Greyed orange-164A     | Brown                   | USA           | Temperate   |
| IS 10877          | Greyed orange-164A     | Brown                   | Nigeria       | Tropical    |
| IS 10893          | Greyed orange-164B     | Brown                   | USA           | Temperate   |
| IS 10968          | Greyed orange-164B     | Brown                   | USA           | Temperate   |
| IS 11060          | White- 155A            | White                   | Ethiopia      | Tropical    |
| IS 11491          | Greyed orange-165B     | Red                     | Ethiopia      | Tropical    |
| IS 11521          | White- 155A            | White                   | Ethiopia      | Tropical    |
| IS 11527          | White- 155B            | White                   | Ethiopia      | Tropical    |
| IS 11550          | Greyed orange-165B     | Red                     | Ethiopia      | Tropical    |
| IS 11818          | Greyed orange-164A     | Brown                   | Ethiopia      | Tropical    |
| IS 11912          | Greyed orange-165B     | Red                     | Ethiopia      | Tropical    |
| IS 11938          | Greyed orange-164B     | Brown                   | Ethiopia      | Tropical    |
| IS 12166          | Greyed orange-164A     | Brown                   | Ethiopia      | Tropical    |
| IS 12267          | Black- 203A            | Black                   | Ethiopia      | Tropical    |
| IS 12290          | White- 155A            | White                   | Zimbabwe      | Temperate   |

|          |                    |        |           |           |
|----------|--------------------|--------|-----------|-----------|
| IS 12294 | Greyed orange-164B | Brown  | Zimbabwe  | Temperate |
| IS 12295 | Greyed orange-164A | Brown  | Zimbabwe  | Temperate |
| IS 12311 | White- 155C        | White  | Zimbabwe  | Temperate |
| IS 12317 | Greyed orange-165B | Red    | Zimbabwe  | Temperate |
| IS 12330 | Greyed orange-164A | Brown  | Nigeria   | Tropical  |
| IS 12569 | Greyed orange-164B | Brown  | Sudan     | Tropical  |
| IS 12666 | White- 155D        | White  | Ethiopia  | Tropical  |
| IS 14316 | Greyed orange-164A | Brown  | Swaziland | Temperate |
| IS 14531 | Greyed orange-165B | Red    | Uganda    | Tropical  |
| IS 14535 | Greyed orange-164A | Brown  | Kenya     | Tropical  |
| IS 14542 | Greyed orange-165B | Red    | Ethiopia  | Tropical  |
| EC488361 | Greyed orange-164B | Brown  | Ethiopia  | Tropical  |
| IS 14813 | White- 155B        | White  | Cameroon  | Tropical  |
| IS 14826 | Greyed orange-165B | Red    | Cameroon  | Tropical  |
| IS 14861 | Greyed orange-164A | Brown  | Cameroon  | Tropical  |
| IS 14932 | YELLOW- 6D         | Yellow | Cameroon  | Tropical  |
| IS 14938 | White- 155C        | White  | Cameroon  | Tropical  |
| IS 14991 | Greyed orange-165B | Red    | Cameroon  | Tropical  |
| IS 15033 | White- 155C        | White  | Cameroon  | Tropical  |
| IS 15042 | White- 155B        | White  | Cameroon  | Tropical  |
| IS 15045 | White- 155B        | White  | Cameroon  | Tropical  |
| IS 15061 | Greyed orange-164A | Brown  | Cameroon  | Tropical  |
| IS 15094 | White- 155C        | White  | Cameroon  | Tropical  |
| IS 15098 | Greyed orange-166A | Red    | Cameroon  | Tropical  |
| IS 15150 | White- 155A        | White  | Cameroon  | Tropical  |
| IS 15191 | Greyed orange-165A | Red    | Cameroon  | Tropical  |
| IS 15222 | White- 155A        | White  | Cameroon  | Tropical  |

**Supplementary Table S2. List of metabolites identified in the grains of 61 diverse sorghum accessions**

| S. no. | RT (min) | Peak m/z | Metabolite annotated          | KEGG ID | Class            | Pathway involved                            |
|--------|----------|----------|-------------------------------|---------|------------------|---------------------------------------------|
| 1      | 9.60     | 134.06   | L-Asparagine                  | C00152  | Amino acids      | Alanine, aspartate and glutamate metabolism |
| 2      | 25.38    | 102.10   | Succinate semialdehyde        | C00232  | Carboxylic acids | Alanine, aspartate and glutamate metabolism |
| 3      | 8.89     | 145.01   | 2-Oxoglutarate                | C00026  | Carboxylic acids | Alanine, aspartate and glutamate metabolism |
| 4      | 5.05     | 104.05   | 4-Aminobutanoate              | C00334  | Amino acids      | Alanine, aspartate and glutamate metabolism |
| 5      | 13.20    | 176.04   | N-Carbamoyl-L-aspartate       | C00438  | Amino acids      | Alanine, aspartate and glutamate metabolism |
| 6      | 6.70     | 211.13   | (-)-Jasmonic acid             | C08491  | Fatty acids      | alpha-Linolenic acid metabolism             |
| 7      | 5.25     | 294.22   | OPC-8:0                       | C04780  | Fatty acids      | alpha-Linolenic acid metabolism             |
| 8      | 29.27    | 100.09   | 3-Hexenol                     | C08492  | Fatty acids      | alpha-Linolenic acid metabolism             |
| 9      | 18.57    | 197.30   | 5Z-Dodecenoic acid            | NA      | Fatty acids      | alpha-Linolenic acid metabolism             |
| 10     | 3.73     | 138.21   | 3,6-Nonadienal                | C16323  | Fatty acids      | alpha-Linolenic acid metabolism             |
| 11     | 20.32    | 171.10   | 9-Oxononanoic acid            | C16322  | Fatty acids      | alpha-Linolenic acid metabolism             |
| 12     | 21.70    | 142.20   | (Z)-3-Hexen-1-ol acetate      | C19757  | Fatty acids      | alpha-Linolenic acid metabolism             |
| 13     | 18.60    | 194.04   | D-Glucuronate                 | C00191  | Monosaccharides  | Amino sugar and nucleotide sugar metabolism |
| 14     | 24.47    | 259.19   | alpha-D-Galactose 1-phosphate | C00446  | Monosaccharides  | Amino sugar and nucleotide sugar metabolism |
| 15     | 6.81     | 259.07   | D-Glucose 1-phosphate         | C00103  | Monosaccharides  | Amino sugar and nucleotide sugar metabolism |
| 16     | 18.21    | 259.19   | D-Mannose 6-phosphate         | C00275  | Monosaccharides  | Amino sugar and nucleotide sugar metabolism |
| 17     | 11.32    | 150.05   | L-Arabinose                   | C00259  | Monosaccharides  | Amino sugar and nucleotide sugar metabolism |
| 18     | 15.50    | 145.16   | Spermidine                    | C00315  | Amino acids      | Arginine and proline metabolism             |
| 19     | 6.42     | 174.22   | L-Arginine                    | C00062  | Amino acids      | Arginine and proline metabolism             |
| 20     | 11.81    | 189.10   | N(omega)-Hydroxyarginine      | C05933  | Amino acids      | Arginine and proline metabolism             |
| 21     | 6.06     | 131.18   | Putrescine                    | C00134  | Amino acids      | Arginine and proline metabolism             |

|    |       |        |                                 |        |                  |                                 |
|----|-------|--------|---------------------------------|--------|------------------|---------------------------------|
| 22 | 17.38 | 298.10 | S-Adenosyl-L-methionine         | C00019 | Cofactors        | Arginine and proline metabolism |
| 23 | 8.82  | 203.22 | Spermine                        | C00750 | Amino acids      | Arginine and proline metabolism |
| 24 | 16.16 | 116.07 | L-Proline                       | C00148 | Amino acids      | Arginine and proline metabolism |
| 25 | 13.64 | 113.09 | (S)-1-Pyrroline-5-carboxylate   | C03912 | Carboxylic acids | Arginine and proline metabolism |
| 26 | 10.30 | 235.14 | p-Coumaroylputrescine           | C18326 | Carboxylic acids | Arginine and proline metabolism |
| 27 | 17.97 | 278.17 | p-Coumaroylagmatine             | C04498 | Carboxylic acids | Arginine and proline metabolism |
| 28 | 7.03  | 265.15 | Feruloylputrescine              | C10497 | Carboxylic acids | Arginine and proline metabolism |
| 29 | 22.20 | 132.00 | Hydroxyproline                  | C01157 | Amino acids      | Arginine and proline metabolism |
| 30 | 12.60 | 218.11 | N-Acetyl-L-citrulline           | C15532 | Carboxylic acids | Arginine biosynthesis           |
| 31 | 9.18  | 175.11 | N-Acetylornithine               | C00437 | Amino acids      | Arginine biosynthesis           |
| 32 | 14.41 | 129.09 | L-Glutamic acid                 | C00025 | Amino acids      | Arginine biosynthesis           |
| 33 | 5.11  | 183.05 | 7-Methyluric acid               | C16355 | Alkaloids        | Caffeine metabolism             |
| 34 | 3.99  | 197.07 | 1,7-Dimethyluric acid           | C16356 | Alkaloids        | Caffeine metabolism             |
| 35 | 7.18  | 183.05 | 1-Methyluric acid               | C16359 | Alkaloids        | Caffeine metabolism             |
| 36 | 7.35  | 196.07 | 3,7-Dimethyluric acid           | C16360 | Alkaloids        | Caffeine metabolism             |
| 37 | 7.77  | 210.00 | 1,3,7-Trimethylurate            | C16361 | Alkaloids        | Caffeine metabolism             |
| 38 | 7.50  | 449.48 | Geranylgeranyl diphosphate      | C00353 | Diterpenoids     | Carotenoid biosynthesis         |
| 39 | 6.97  | 263.32 | Abscisate                       | C06082 | Apocarotenoids   | Carotenoid biosynthesis         |
| 40 | 25.38 | 569.44 | Zeaxanthin                      | C06098 | Carotenoids      | Carotenoid biosynthesis         |
| 41 | 27.36 | 585.43 | Antheraxanthin                  | C08579 | Carotenoids      | Carotenoid biosynthesis         |
| 42 | 18.15 | 569.44 | Lutein                          | C08601 | Carotenoids      | Carotenoid biosynthesis         |
| 43 | 12.80 | 500.04 | 9'-cis-Neoxanthin               | C13431 | Carotenoids      | Carotenoid biosynthesis         |
| 44 | 4.86  | 248.17 | Absciscic aldehyde              | C13455 | Sesquiterpenoids | Carotenoid biosynthesis         |
| 45 | 4.43  | 279.15 | 8'-Hydroxyabscisate             | C15514 | Carboxylic acids | Carotenoid biosynthesis         |
| 46 | 7.54  | 426.05 | beta-D-Glucopyranosyl abscisate | C15970 | Carboxylic acids | Carotenoid biosynthesis         |
| 47 | 26.56 | 376.27 | 9-cis-10'-Apo-beta-carotenal    | C20692 | Apocarotenoids   | Carotenoid biosynthesis         |
| 48 | 28.44 | 302.13 | Carlactone                      | C20693 | Lactones         | Carotenoid biosynthesis         |
| 49 | 18.25 | 250.31 | Xanthoxin                       | C13453 | Carotenoids      | Carotenoid biosynthesis         |
| 50 | 22.95 | 564.43 | Canthaxanthin                   | C08583 | Carotenoids      | Carotenoid biosynthesis         |
| 51 | 4.71  | 347.57 | Gibberellin A1                  | C00859 | Diterpenoids     | Diterpenoid biosynthesis        |
| 52 | 11.34 | 314.94 | Gibberellin A9                  | C11863 | Diterpenoids     | Diterpenoid biosynthesis        |
| 53 | 9.33  | 346.40 | Gibberellin A34                 | C11868 | Diterpenoids     | Diterpenoid biosynthesis        |

|    |       |        |                              |        |                |                                   |
|----|-------|--------|------------------------------|--------|----------------|-----------------------------------|
| 54 | 3.28  | 347.08 | Gibberellin A29              | C06096 | Diterpenoids   | Diterpenoid biosynthesis          |
| 55 | 9.99  | 69.04  | (E,E)-Geranyllinalool        | C20681 | Monoterpenoids | Diterpenoid biosynthesis          |
| 56 | 18.57 | 200.18 | Dodecanoic acid              | C02679 | Fatty acids    | Fatty acid biosynthesis           |
| 57 | 19.04 | 253.30 | (9Z)-Hexadecenoic acid       | C08362 | Fatty acids    | Fatty acid biosynthesis           |
| 58 | 17.03 | 317.07 | 3,7,4'-Tri-O-methylquercetin | C04444 | Flavonoids     | Flavone and flavonol biosynthesis |
| 59 | 18.00 | 287.06 | Afzelin                      | C16911 | Flavonoids     | Flavone and flavonol biosynthesis |
| 60 | 18.44 | 151.00 | Naringenin                   | C00509 | Flavonoids     | Flavonoid biosynthesis            |
| 61 | 12.20 | 107.04 | Phloretin                    | C00774 | Flavonoids     | Flavonoid biosynthesis            |
| 62 | 21.73 | 287.05 | Dihydrokaempferol            | C00974 | Flavonoids     | Flavonoid biosynthesis            |
| 63 | 22.33 | 288.06 | Fustin                       | C01378 | Flavonoids     | Flavonoid biosynthesis            |
| 64 | 25.97 | 271.06 | Apigenin                     | C01477 | Flavonoids     | Flavonoid biosynthesis            |
| 65 | 26.46 | 285.00 | Luteolin                     | C01514 | Flavonoids     | Flavonoid biosynthesis            |
| 66 | 28.50 | 305.10 | Taxifolin                    | C01617 | Flavonoids     | Flavonoid biosynthesis            |
| 67 | 28.97 | 595.04 | Eriocitrin                   | C09732 | Flavonoids     | Flavonoid biosynthesis            |
| 68 | 15.40 | 289.07 | Eriodictyol                  | C05631 | Flavonoids     | Flavonoid biosynthesis            |
| 69 | 29.26 | 287.06 | Kaempferol                   | C05903 | Flavonoids     | Flavonoid biosynthesis            |
| 70 | 29.48 | 271.05 | Genistein                    | C06563 | Flavonoids     | Flavonoid biosynthesis            |
| 71 | 29.16 | 580.11 | Naringin                     | C09789 | Flavonoids     | Flavonoid biosynthesis            |
| 72 | 23.60 | 417.08 | Kaempferol-3-O-arabinoside   | C12626 | Flavonoids     | Flavonoid biosynthesis            |
| 73 | 28.50 | 356.05 | 5'-Prenyleriodictyol         | NA     | Flavonoids     | Flavonoid biosynthesis            |
| 74 | 27.16 | 301.10 | Kaempferide                  | C10098 | Flavonoids     | Flavonoid biosynthesis            |
| 75 | 29.80 | 302.04 | Pentahydroxyflavanone        | C05911 | Flavonoids     | Flavonoid biosynthesis            |
| 76 | 25.44 | 153.01 | Naringenin chalcone          | C06561 | Flavonoids     | Flavonoid biosynthesis            |
| 77 | 29.26 | 289.07 | (+)-Catechin                 | C06562 | Flavonoids     | Flavonoid biosynthesis            |
| 78 | 26.45 | 431.10 | Apigenin-7-O-glucoside       | C04608 | Flavonoids     | Flavonoid biosynthesis            |
| 79 | 29.54 | 291.08 | (-)-Epicatechin              | C09727 | Flavonoids     | Flavonoid biosynthesis            |
| 80 | 28.11 | 449.10 | Luteolin 7-glucoside         | C03951 | Flavonoids     | Flavonoid biosynthesis            |
| 81 | 24.13 | 147.00 | Garbanzol                    | C09751 | Flavonoids     | Flavonoid biosynthesis            |
| 82 | 22.11 | 269.04 | Galangin                     | C10044 | Flavonoids     | Flavonoid biosynthesis            |
| 83 | 25.86 | 301.07 | Hesperetin                   | C01709 | Flavonoids     | Flavonoid biosynthesis            |
| 84 | 29.00 | 273.08 | (-)-Epiafzelechin            | C12128 | Flavonoids     | Flavonoid biosynthesis            |
| 85 | 28.12 | 305.06 | (-)-Epigallocatechin         | C12136 | Flavonoids     | Flavonoid biosynthesis            |
| 86 | 19.15 | 449.07 | Eriodictyol-7-O-glucoside    | NA     | Flavonoids     | Flavonoid biosynthesis            |
| 87 | 18.43 | 302.08 | Homoeriodictyol              | C09756 | Flavonoids     | Flavonoid biosynthesis            |
| 88 | 19.22 | 283.09 | 2',5-Dimethoxyflavone        | NA     | Flavonoids     | Flavonoid biosynthesis            |
| 89 | 18.63 | 103.05 | Pinocembrin                  | C09827 | Flavonoids     | Flavonoid biosynthesis            |

|     |       |        |                               |        |                  |                                                     |
|-----|-------|--------|-------------------------------|--------|------------------|-----------------------------------------------------|
| 90  | 19.06 | 303.05 | Quercetin                     | C00389 | Flavonoids       | Flavonoid biosynthesis                              |
| 91  | 21.37 | 464.35 | Quercetin-3-O-glucoside       | C05623 | Flavonoids       | Flavonoid biosynthesis                              |
| 92  | 21.70 | 320.05 | Myricetin                     | C10107 | Flavonoids       | Flavonoid biosynthesis                              |
| 93  | 20.09 | 137.07 | 4-Hydroxybenzoate             | C00156 | Carboxylic acids | Folate biosynthesis                                 |
| 94  | 24.79 | 360.43 | Tetrahydrofolate              | C00101 | Cofactors        | Folate biosynthesis                                 |
| 95  | 7.10  | 296.10 | Dihydrofolate                 | C00415 | Pterins          | Folate biosynthesis                                 |
| 96  | 7.58  | 314.29 | Dihydropteroate               | C00921 | Pterins          | Folate biosynthesis                                 |
| 97  | 19.44 | 138.00 | 4-Aminobenzoate               | C00568 | Amino acids      | Folate biosynthesis                                 |
| 98  | 16.62 | 363.22 | Cyclic pyranopterin phosphate | C18239 | Pterins          | Folate biosynthesis                                 |
| 99  | 22.00 | 122.00 | Thiamin diphosphate           | C00068 | Cofactors        | Glycolysis / Gluconeogenesis                        |
| 100 | 9.88  | 96.82  | Glycerone phosphate           | C00111 | Monosaccharides  | Glycolysis / Gluconeogenesis                        |
| 101 | 21.85 | 237.11 | L-Homoserine                  | C00263 | Carboxylic acids | Lysine biosynthesis                                 |
| 102 | 13.64 | 190.10 | Diaminopimelic acid           | C00666 | Carboxylic acids | Lysine biosynthesis                                 |
| 103 | 18.60 | 272.20 | meso-2,6-Diaminoheptanedioate | C00680 | Carboxylic acids | Lysine biosynthesis                                 |
| 104 | 13.56 | 134.10 | L-Aspartate                   | C00049 | Amino acids      | Lysine biosynthesis                                 |
| 105 | 18.21 | 138.00 | (+)-Neomenthol                | C00553 | Monoterpenoids   | Monoterpenoid biosynthesis                          |
| 106 | 16.62 | 166.10 | 8-Oxogeranial                 | C17622 | Monoterpenoids   | Monoterpenoid biosynthesis                          |
| 107 | 24.63 | 169.00 | Phosphoenolpyruvate           | C00074 | Carboxylic acids | Phenylalanine, tyrosine and tryptophan biosynthesis |
| 108 | 9.86  | 188.13 | L-Tryptophan                  | C00078 | Amino acids      | Phenylalanine, tyrosine and tryptophan biosynthesis |
| 109 | 16.98 | 91.00  | Phenylpyruvate                | C00166 | Carboxylic acids | Phenylalanine, tyrosine and tryptophan biosynthesis |
| 110 | 17.87 | 173.04 | 3-Dehydroshikimate            | C02637 | Carboxylic acids | Phenylalanine, tyrosine and tryptophan biosynthesis |
| 111 | 5.68  | 254.13 | Shikimate 3-phosphate         | C03175 | Carboxylic acids | Phenylalanine, tyrosine and tryptophan biosynthesis |
| 112 | 21.76 | 287.13 | Indoleglycerol phosphate      | C03506 | Sugar Phosphates | Phenylalanine, tyrosine and tryptophan biosynthesis |
| 113 | 16.89 | 226.10 | Prephenate                    | C00254 | Carboxylic acids | Phenylalanine, tyrosine and tryptophan biosynthesis |
| 114 | 11.05 | 93.30  | Shikimate                     | C00493 | Carboxylic acids | Phenylalanine, tyrosine and tryptophan biosynthesis |
| 115 | 9.16  | 196.10 | 3-Dehydroquinate              | C00944 | Carboxylic acids | Phenylalanine, tyrosine and tryptophan biosynthesis |
| 116 | 16.53 | 96.97  | D-Erythrose 4-phosphate       | C00279 | Sugar Phosphates | Phenylalanine, tyrosine and tryptophan biosynthesis |
| 117 | 7.30  | 151.00 | Anthranilate                  | C00108 | Carboxylic acids | Phenylalanine, tyrosine and tryptophan biosynthesis |
| 118 | 18.63 | 120.99 | L-Phenylalanine               | C00079 | Amino acids      | Phenylpropanoid biosynthesis                        |
| 119 | 17.97 | 413.03 | p-Coumaroyl-CoA               | C00223 | Phenylpropanoids | Phenylpropanoid biosynthesis                        |

|     |       |        |                                          |        |                  |                                               |
|-----|-------|--------|------------------------------------------|--------|------------------|-----------------------------------------------|
| 120 | 9.20  | 430.15 | Caffeoyl-CoA                             | C00323 | Phenylpropanoids | Phenylpropanoid biosynthesis                  |
| 121 | 12.86 | 148.05 | trans-Cinnamate                          | C00423 | Phenylpropanoids | Phenylpropanoid biosynthesis                  |
| 122 | 20.18 | 119.00 | 4-Coumarate                              | C00811 | Phenylpropanoids | Phenylpropanoid biosynthesis                  |
| 123 | 19.31 | 131.00 | Cinnamaldehyde                           | C00903 | Phenylpropanoids | Phenylpropanoid biosynthesis                  |
| 124 | 27.22 | 194.00 | Ferulate                                 | C01494 | Phenylpropanoids | Phenylpropanoid biosynthesis                  |
| 125 | 10.30 | 131.04 | 4-Coumaryl alcohol                       | C02646 | Phenylpropanoids | Phenylpropanoid biosynthesis                  |
| 126 | 10.37 | 178.00 | Coniferyl aldehyde                       | C02666 | Phenylpropanoids | Phenylpropanoid biosynthesis                  |
| 127 | 21.93 | 149.05 | p-Coumaraldehyde                         | C05608 | Phenylpropanoids | Phenylpropanoid biosynthesis                  |
| 128 | 22.27 | 147.00 | 2-Coumarinate                            | C05838 | Phenylpropanoids | Phenylpropanoid biosynthesis                  |
| 129 | 18.15 | 164.08 | Caffeic aldehyde                         | C10945 | Phenylpropanoids | Phenylpropanoid biosynthesis                  |
| 130 | 18.53 | 194.11 | 5-Hydroxyconiferaldehyde                 | C12204 | Phenylpropanoids | Phenylpropanoid biosynthesis                  |
| 131 | 20.15 | 165.05 | Caffeyl alcohol                          | C12206 | Phenylpropanoids | Phenylpropanoid biosynthesis                  |
| 132 | 17.85 | 209.08 | Sinapoyl aldehyde                        | C05610 | Phenylpropanoids | Phenylpropanoid biosynthesis                  |
| 133 | 18.22 | 204.00 | Coniferyl alcohol                        | C00590 | Phenylpropanoids | Phenylpropanoid biosynthesis                  |
| 134 | 17.86 | 173.00 | p-Coumaroyl quinic acid                  | C12208 | Phenylpropanoids | Phenylpropanoid biosynthesis                  |
| 135 | 11.28 | 196.00 | 5-Hydroxyconiferyl alcohol               | C12205 | Phenylpropanoids | Phenylpropanoid biosynthesis                  |
| 136 | 12.42 | 207.00 | Sinapate                                 | C00482 | Phenylpropanoids | Phenylpropanoid biosynthesis                  |
| 137 | 12.85 | 73.00  | Syringin                                 | C01533 | Phenylpropanoids | Phenylpropanoid biosynthesis                  |
| 138 | 15.98 | 365.12 | Coniferin                                | C00761 | Phenylpropanoids | Phenylpropanoid biosynthesis                  |
| 139 | 16.06 | 251.09 | Sinapine                                 | C00933 | Phenylpropanoids | Phenylpropanoid biosynthesis                  |
| 140 | 4.79  | 276.24 | 5-Amino-6-(1-D-ribitylamino)uracil       | C04732 | Glycosides       | Riboflavin metabolism                         |
| 141 | 4.90  | 184.08 | L-3,4-Dihydroxybutan-2-one 4-phosphate   | C15556 | Sugar Phosphates | Riboflavin metabolism                         |
| 142 | 10.95 | 326.30 | 6,7-Dimethyl-8-(D-ribityl)lumazine       | C04332 | Pteridines       | Riboflavin metabolism                         |
| 143 | 7.59  | 354.21 | 5-Amino-6-(5'-phosphoribosylamino)uracil | C01268 | Glycosides       | Riboflavin metabolism                         |
| 144 | 21.77 | 455.12 | Flavin adenine dinucleotide              | C00016 | Cofactors        | Riboflavin metabolism                         |
| 145 | 15.86 | 426.70 | (S)-2,3-Epoxysqualene                    | C01054 | Triterpenoids    | Sesquiterpenoid and triterpenoid biosynthesis |
| 146 | 14.44 | 426.00 | Lupeol                                   | C08628 | Triterpenoids    | Sesquiterpenoid and triterpenoid biosynthesis |
| 147 | 17.94 | 204.35 | Trichodiene                              | C01860 | Sesquiterpenoids | Sesquiterpenoid and triterpenoid biosynthesis |
| 148 | 19.28 | 204.00 | Humulene                                 | C09684 | Sesquiterpenoids | Sesquiterpenoid and triterpenoid biosynthesis |
| 149 | 20.77 | 93.01  | beta-Caryophyllene                       | C09629 | Sesquiterpenoids | Sesquiterpenoid and triterpenoid biosynthesis |
| 150 | 17.85 | 107.00 | gamma-Bisabolene                         | C16814 | Sesquiterpenoids | Sesquiterpenoid and triterpenoid biosynthesis |

|     |       |        |                                     |        |                    |                                               |
|-----|-------|--------|-------------------------------------|--------|--------------------|-----------------------------------------------|
| 151 | 18.44 | 204.34 | (+)-alpha-Barbatene                 | C19740 | Sesquiterpenoids   | Sesquiterpenoid and triterpenoid biosynthesis |
| 152 | 16.96 | 189.00 | (+)-beta-Chamigrene                 | C19908 | Sesquiterpenoids   | Sesquiterpenoid and triterpenoid biosynthesis |
| 153 | 14.56 | 204.19 | (+)-Thujopsene                      | C20724 | Sesquiterpenoids   | Sesquiterpenoid and triterpenoid biosynthesis |
| 154 | 16.65 | 363.10 | Farnesyl diphosphate                | C00448 | Sesquiterpenoids   | Steroid biosynthesis                          |
| 155 | 15.16 | 411.39 | Squalene                            | C00751 | Triterpenoids      | Steroid biosynthesis                          |
| 156 | 25.95 | 414.39 | Sitosterol                          | C01753 | Steroids           | Steroid biosynthesis                          |
| 157 | 12.95 | 400.37 | Campesterol                         | C01789 | Steroids           | Steroid biosynthesis                          |
| 158 | 15.55 | 586.10 | Presqualene diphosphate             | C03428 | Triterpenoids      | Steroid biosynthesis                          |
| 159 | 19.40 | 412.37 | Stigmasterol                        | C05442 | Steroids           | Steroid biosynthesis                          |
| 160 | 11.24 | 353.70 | Brassicasterol                      | C08813 | Steroids           | Steroid biosynthesis                          |
| 161 | 15.23 | 434.69 | 6-Deoxytyphasterol                  | C15801 | Steroids           | Steroid biosynthesis                          |
| 162 | 18.79 | 171.15 | Glyceraldehyde 3-phosphate          | C00118 | Organophosphate    | Terpenoid backbone biosynthesis               |
| 163 | 20.76 | 91.03  | 2-trans,6-trans-Farnesal            | C03461 | Sesquiterpenoids   | Terpenoid backbone biosynthesis               |
| 164 | 16.63 | 217.05 | 2-C-Methyl-D-erythritol 4-phosphate | C11434 | Fatty Alcohols     | Terpenoid backbone biosynthesis               |
| 165 | 18.21 | 214.03 | 1-Deoxy-D-xylulose 5-phosphate      | C11437 | Sugar Phosphates   | Terpenoid backbone biosynthesis               |
| 166 | 21.85 | 102.02 | N-Acetylserotonin                   | C00978 | Fatty acids        | Tryptophan metabolism                         |
| 167 | 22.00 | 177.10 | Serotonin                           | C00780 | Alkaloids          | Tryptophan metabolism                         |
| 168 | 16.30 | 220.08 | 5-Hydroxy-L-tryptophan              | C00643 | Amino acids        | Tryptophan metabolism                         |
| 169 | 20.32 | 68.90  | 2-Oxoadipate                        | C00322 | Carboxylic acids   | Tryptophan metabolism                         |
| 170 | 4.86  | 158.06 | Indole-3-acetaldehyde               | C00637 | Indoles            | Tryptophan metabolism                         |
| 171 | 4.90  | 147.00 | 5-Hydroxyindoleacetaldehyde         | C05634 | Indoleacetic Acids | Tryptophan metabolism                         |
| 172 | 12.60 | 131.00 | Indole-3-acetamide                  | C02693 | Indoleacetic Acids | Tryptophan metabolism                         |
| 173 | 19.26 | 152.07 | 3,4-Dihydroxy-L-phenylalanine       | C00355 | Amino acids        | Tyrosine metabolism                           |
| 174 | 20.05 | 186.12 | 3-Fumarylpyruvate                   | C02514 | Carboxylic acids   | Tyrosine metabolism                           |
| 175 | 21.89 | 473.36 | 4-Fumarylacetoacetate               | C01061 | Carboxylic acids   | Tyrosine metabolism                           |
| 176 | 27.04 | 198.13 | 4-Maleylacetoacetate                | C01036 | Carboxylic acids   | Tyrosine metabolism                           |
| 177 | 18.64 | 169.05 | Homogentisate                       | C00544 | Carboxylic acids   | Tyrosine metabolism                           |
| 178 | 27.17 | 92.10  | 3-(4-Hydroxyphenyl)pyruvate         | C01179 | Carboxylic acids   | Tyrosine metabolism                           |
| 179 | 27.22 | 137.93 | Tyramine                            | C00483 | Alkaloids          | Tyrosine metabolism                           |
| 180 | 18.25 | 137.05 | Dopamine                            | C03758 | Alkaloids          | Tyrosine metabolism                           |
| 181 | 20.50 | 88.00  | Pyruvate                            | C00022 | Carboxylic acids   | Tyrosine metabolism                           |
| 182 | 20.69 | 130.06 | Acetoacetate                        | C00164 | Carboxylic acids   | Tyrosine metabolism                           |

|     |       |        |                                                                |        |                  |                                               |
|-----|-------|--------|----------------------------------------------------------------|--------|------------------|-----------------------------------------------|
| 183 | 24.77 | 123.01 | 3,4-Dihydroxyphenylacetaldehyde                                | C04043 | Carboxylic acids | Tyrosine metabolism                           |
| 184 | 18.95 | 163.06 | L-Tyrosine                                                     | C00082 | Amino acids      | Ubiquinone and terpenoid-quinone biosynthesis |
| 185 | 28.13 | 227.06 | Chorismate                                                     | C00251 | Carboxylic acids | Ubiquinone and terpenoid-quinone biosynthesis |
| 186 | 26.45 | 417.60 | beta-Tocopherol                                                | C14152 | Prenol lipids    | Ubiquinone and terpenoid-quinone biosynthesis |
| 187 | 27.89 | 438.00 | Demethylphyloquinol                                            | C21084 | Prenol lipids    | Ubiquinone and terpenoid-quinone biosynthesis |
| 188 | 26.38 | 328.08 | 2-Succinyl-5-enolpyruvyl-6-hydroxy-3-cyclohexene-1-carboxylate | C16519 | Carboxylic acids | Ubiquinone and terpenoid-quinone biosynthesis |
| 189 | 26.46 | 240.06 | SHCHC                                                          | C05817 | Carboxylic acids | Ubiquinone and terpenoid-quinone biosynthesis |
| 190 | 11.19 | 224.17 | Isochorismate                                                  | C00885 | Carboxylic acids | Ubiquinone and terpenoid-quinone biosynthesis |
| 191 | 21.10 | 456.49 | Phytyl diphosphate                                             | C05427 | Diterpenoids     | Ubiquinone and terpenoid-quinone biosynthesis |
| 192 | 28.15 | 416.35 | Gamma-Tocotrienol                                              | C14155 | Prenol lipids    | Ubiquinone and terpenoid-quinone biosynthesis |
| 193 | 28.43 | 310.01 | Menaquinol                                                     | C05819 | Prenol lipids    | Ubiquinone and terpenoid-quinone biosynthesis |
| 194 | 20.99 | 410.56 | 6-Geranylgeranyl-2,3-dimethylbenzene-1,4-diol                  | C20738 | Benzenediols     | Ubiquinone and terpenoid-quinone biosynthesis |
| 195 | 21.81 | 416.37 | beta-Tocotrienol                                               | C14154 | Prenol lipids    | Ubiquinone and terpenoid-quinone biosynthesis |
| 196 | 16.62 | 89.03  | 2-Oxoisocaproate                                               | C00233 | Carboxylic acids | Valine, leucine and isoleucine biosynthesis   |
| 197 | 18.22 | 89.05  | (S)-3-Methyl-2-oxopentanoate                                   | C00671 | Carboxylic acids | Valine, leucine and isoleucine biosynthesis   |
| 198 | 17.05 | 129.02 | Citraconate                                                    | C02226 | Carboxylic acids | Valine, leucine and isoleucine biosynthesis   |
| 199 | 18.69 | 147.07 | D-Citramalate                                                  | C02612 | Carboxylic acids | Valine, leucine and isoleucine biosynthesis   |
| 200 | 21.11 | 146.17 | (S)-2-Aceto-2-hydroxybutanoate                                 | C06006 | Carboxylic acids | Valine, leucine and isoleucine biosynthesis   |
| 201 | 18.57 | 148.10 | D-erythro-3-Methylmalate                                       | C06032 | Carboxylic acids | Valine, leucine and isoleucine biosynthesis   |
| 202 | 18.06 | 103.06 | L-Threonine                                                    | C00188 | Amino acids      | Valine, leucine and isoleucine biosynthesis   |
| 203 | 19.53 | 60.00  | 2-Oxobutanoate                                                 | C00109 | Carboxylic acids | Valine, leucine and isoleucine biosynthesis   |
| 204 | 10.20 | 147.06 | (R)-2,3-Dihydroxy-3-methylpentanoate                           | C06007 | Carboxylic acids | Valine, leucine and isoleucine biosynthesis   |
| 205 | 14.97 | 177.08 | alpha-Isopropylmalate                                          | C02504 | Carboxylic acids | Valine, leucine and isoleucine biosynthesis   |

|     |       |        |                                 |        |                  |                                             |
|-----|-------|--------|---------------------------------|--------|------------------|---------------------------------------------|
| 206 | 14.66 | 175.15 | 3-Isopropylmalate               | C04411 | Carboxylic acids | Valine, leucine and isoleucine biosynthesis |
| 207 | 10.68 | 133.07 | (S)-2-Acetolactate              | C06010 | Carboxylic acids | Valine, leucine and isoleucine biosynthesis |
| 208 | 11.11 | 175.06 | 2-Isopropylmaleate              | C02631 | Carboxylic acids | Valine, leucine and isoleucine biosynthesis |
| 209 | 11.07 | 174.15 | (2S)-2-Isopropyl-3-oxosuccinate | C04236 | Carboxylic acids | Valine, leucine and isoleucine biosynthesis |
| 210 | 13.57 | 422.14 | Propanoyl-CoA                   | C00100 | Fatty acids      | Valine, leucine and isoleucine degradation  |
| 211 | 19.53 | 86.04  | L-Leucine                       | C00123 | Amino acids      | Valine, leucine and isoleucine degradation  |
| 212 | 20.13 | 134.96 | L-Valine                        | C00183 | Amino acids      | Valine, leucine and isoleucine degradation  |
| 213 | 19.65 | 130.11 | L-Isoleucine                    | C00407 | Amino acids      | Valine, leucine and isoleucine degradation  |
| 214 | 5.35  | 115.07 | 3-Methyl-2-oxobutanoic acid     | C00141 | Carboxylic acids | Valine, leucine and isoleucine degradation  |
| 215 | 4.23  | 101.07 | (S)-Methylmalonate semialdehyde | C06002 | Carboxylic acids | Valine, leucine and isoleucine degradation  |
| 216 | 9.44  | 150.07 | 2-Methylbenzoic acid            | C07215 | Carboxylic acids | Valine, leucine and isoleucine degradation  |
| 217 | 13.43 | 104.07 | (R)-3-Amino-2-methylpropanoate  | C01205 | Amino acids      | Valine, leucine and isoleucine degradation  |
| 218 | 17.21 | 247.30 | Pyridoxine phosphate            | C00627 | Vitamins         | Vitamin B6 metabolism                       |
| 219 | 9.52  | 169.07 | Pyridoxine                      | C00314 | Vitamins         | Vitamin B6 metabolism                       |
| 220 | 9.47  | 150.05 | Pyridoxal                       | C00250 | Vitamins         | Vitamin B6 metabolism                       |
| 221 | 12.04 | 184.06 | 4-Pyridoxylic acid              | C00847 | Amino acids      | Vitamin B6 metabolism                       |

**Supplementary Table S3. Abundance ratio of 163 metabolites showing more than 2 fold change between colored and white grain sorghums**

| S.no | Compound                   | Fold Change | log2 (Fold Change) |
|------|----------------------------|-------------|--------------------|
| 1    | (+)-Catechin               | 17.33       | 4.12               |
| 2    | trans-Cinnamate            | 14.26       | 3.83               |
| 3    | Naringenin                 | 12.55       | 3.65               |
| 4    | Cinnamaldehyde             | 10.29       | 3.36               |
| 5    | L-Isoleucine               | 9.73        | 3.28               |
| 6    | Naringenin chalcone        | 9.72        | 3.28               |
| 7    | Genistein                  | 9.45        | 3.24               |
| 8    | Stigmasterol               | 9.08        | 3.18               |
| 9    | 2-Coumarinate              | 8.86        | 3.15               |
| 10   | 2-trans,6-trans-Farnesal   | 8.70        | 3.12               |
| 11   | Apigenin                   | 8.41        | 3.07               |
| 12   | Eriodictyol                | 8.39        | 3.07               |
| 13   | Kaempferol                 | 8.33        | 3.06               |
| 14   | Lutein                     | 8.18        | 3.03               |
| 15   | (-)-Epicatechin            | 8.13        | 3.02               |
| 16   | Spermidine                 | 7.23        | 2.85               |
| 17   | L-Leucine                  | 7.20        | 2.85               |
| 18   | Presqualene diphosphate    | 7.10        | 2.83               |
| 19   | Luteolin                   | 7.07        | 2.82               |
| 20   | Kaempferol-3-O-arabinoside | 7.05        | 2.82               |
| 21   | Sitosterol                 | 6.84        | 2.77               |
| 22   | Hesperetin                 | 6.67        | 2.74               |
| 23   | Caffeoyl-CoA               | 6.51        | 2.70               |
| 24   | p-Coumaroyl-CoA            | 6.30        | 2.67               |
| 25   | Campesterol                | 6.28        | 2.65               |
| 26   | Abcisate                   | 6.26        | 2.65               |
| 27   | (S)-2,3-Epoxy-squalene     | 6.20        | 2.63               |
| 28   | Farnesyl diphosphate       | 6.11        | 2.61               |
| 29   | (-)-Epigallocatechin       | 6.08        | 2.60               |
| 30   | Squalene                   | 6.06        | 2.60               |
| 31   | Luteolin 7-glucoside       | 6.02        | 2.59               |
| 32   | Ferulate                   | 5.94        | 2.57               |
| 33   | 2',5-Dimethoxyflavone      | 5.72        | 2.52               |
| 34   | p-Coumaraldehyde           | 5.54        | 2.47               |
| 35   | Zeaxanthin                 | 5.48        | 2.46               |

|    |                                     |      |      |
|----|-------------------------------------|------|------|
| 36 | Dihydrokaempferol                   | 5.48 | 2.45 |
| 37 | Pentahydroxyflavanone               | 5.47 | 2.45 |
| 38 | Caffeyl alcohol                     | 5.41 | 2.44 |
| 39 | Lupeol                              | 5.34 | 2.42 |
| 40 | Naringin                            | 5.32 | 2.41 |
| 41 | Eriocitrin                          | 5.32 | 2.41 |
| 42 | L-Tryptophan                        | 5.32 | 2.41 |
| 43 | 5'-Prenyleriodictyol                | 5.31 | 2.41 |
| 44 | Brassicasterol                      | 5.31 | 2.41 |
| 45 | Coniferyl aldehyde                  | 5.29 | 2.40 |
| 46 | Kaempferide                         | 5.26 | 2.40 |
| 47 | (S)-3-Methyl-2-oxopentanoate        | 5.15 | 2.37 |
| 48 | 4-Coumaryl alcohol                  | 5.15 | 2.37 |
| 49 | Caffeic aldehyde                    | 5.12 | 2.36 |
| 50 | Homoeriodictyol                     | 5.07 | 2.34 |
| 51 | Eriodictyol-7-O-glucoside           | 5.04 | 2.33 |
| 52 | beta-Tocopherol                     | 5.02 | 2.33 |
| 53 | L-Valine                            | 4.86 | 2.28 |
| 54 | L-Phenylalanine                     | 4.76 | 2.25 |
| 55 | 5-Hydroxyconiferaldehyde            | 4.66 | 2.22 |
| 56 | 2-Oxoisocaproate                    | 4.64 | 2.22 |
| 57 | Chorismate                          | 4.64 | 2.21 |
| 58 | (-)-Epiafzelechin                   | 4.61 | 2.20 |
| 59 | beta-D-Glucopyranosyl abscisate     | 4.58 | 2.20 |
| 60 | Taxifolin                           | 4.50 | 2.17 |
| 61 | 8-Oxogeranial                       | 4.41 | 2.14 |
| 62 | Dodecanoic acid                     | 4.40 | 2.14 |
| 63 | Antheraxanthin                      | 4.38 | 2.13 |
| 64 | Galangin                            | 4.37 | 2.13 |
| 65 | Phloretin                           | 4.32 | 2.11 |
| 66 | 2-C-Methyl-D-erythritol 4-phosphate | 4.31 | 2.11 |
| 67 | (S)-2-Acetolactate                  | 4.25 | 2.09 |
| 68 | 8'-Hydroxyabscisate                 | 4.23 | 2.08 |
| 69 | Absciscic aldehyde                  | 4.22 | 2.08 |
| 70 | 4-Coumarate                         | 4.18 | 2.06 |
| 71 | (S)-2-Aceto-2-hydroxybutanoate      | 4.10 | 2.04 |
| 72 | Demethylphylloquinol                | 4.08 | 2.03 |
| 73 | (+)-Neomenthol                      | 4.06 | 2.02 |

|     |                                      |      |      |
|-----|--------------------------------------|------|------|
| 74  | (9Z)-Hexadecenoic acid               | 4.04 | 2.01 |
| 75  | Coniferyl alcohol                    | 4.00 | 2.00 |
| 76  | Phosphoenolpyruvate                  | 3.99 | 2.00 |
| 77  | Propanoyl-CoA                        | 3.95 | 1.98 |
| 78  | (R)-2,3-Dihydroxy-3-methylpentanoate | 3.92 | 1.97 |
| 79  | Pinocembrin                          | 3.89 | 1.96 |
| 80  | 9-cis-10'-Apo-beta-carotenal         | 3.89 | 1.96 |
| 81  | Flavin adenine dinucleotide          | 3.84 | 1.94 |
| 82  | S-Adenosyl-L-methionine              | 3.83 | 1.94 |
| 83  | Pyruvate                             | 3.73 | 1.90 |
| 84  | 2-Oxoglutarate                       | 3.71 | 1.89 |
| 85  | L-Arginine                           | 3.70 | 1.89 |
| 86  | Tetrahydrofolate                     | 3.69 | 1.88 |
| 87  | alpha-Isopropylmalate                | 3.69 | 1.88 |
| 88  | D-Glucose 1-phosphate                | 3.68 | 1.88 |
| 89  | Anthranilate                         | 3.64 | 1.86 |
| 90  | 2-Oxobutanoate                       | 3.58 | 1.84 |
| 91  | Glycerone phosphate                  | 3.56 | 1.83 |
| 92  | 3-Methyl-2-oxobutanoic acid          | 3.50 | 1.81 |
| 93  | L-Proline                            | 3.50 | 1.81 |
| 94  | L-Asparagine                         | 3.46 | 1.79 |
| 95  | Acetoacetate                         | 3.46 | 1.79 |
| 96  | L-Threonine                          | 3.45 | 1.79 |
| 97  | D-Glucuronate                        | 3.43 | 1.78 |
| 98  | Succinate semialdehyde               | 3.35 | 1.74 |
| 99  | Pyridoxal                            | 3.33 | 1.73 |
| 100 | Prephenate                           | 3.31 | 1.73 |
| 101 | D-Mannose 6-phosphate                | 3.28 | 1.72 |
| 102 | D-Erythrose 4-phosphate              | 3.28 | 1.71 |
| 103 | Pyridoxine                           | 3.22 | 1.68 |
| 104 | 2-Oxoadipate                         | 3.20 | 1.68 |
| 105 | 4-Aminobutanoate                     | 3.16 | 1.66 |
| 106 | 2-Methylbenzoic acid                 | 3.14 | 1.65 |
| 107 | 3,4-Dihydroxy-L-phenylalanine        | 3.12 | 1.64 |
| 108 | Quercetin                            | 3.09 | 1.63 |
| 109 | Dihydrofolate                        | 3.04 | 1.60 |
| 110 | Putrescine                           | 3.03 | 1.60 |
| 111 | N-Acetylornithine                    | 2.98 | 1.58 |

|     |                               |      |      |
|-----|-------------------------------|------|------|
| 112 | N-Carbamoyl-L-aspartate       | 2.96 | 1.56 |
| 113 | L-Aspartate                   | 2.93 | 1.55 |
| 114 | alpha-D-Galactose 1-phosphate | 2.92 | 1.55 |
| 115 | Indole-3-acetaldehyde         | 2.91 | 1.54 |
| 116 | 5-Hydroxy-L-tryptophan        | 2.90 | 1.54 |
| 117 | L-Homoserine                  | 2.89 | 1.53 |
| 118 | meso-2,6-Diaminoheptanedioate | 2.88 | 1.52 |
| 119 | Spermine                      | 2.86 | 1.51 |
| 120 | Coniferin                     | 2.85 | 1.51 |
| 121 | Serotonin                     | 2.80 | 1.48 |
| 122 | Gibberellin A1                | 2.77 | 1.47 |
| 123 | Isochorismate                 | 2.77 | 1.47 |
| 124 | Dihydropteroate               | 2.75 | 1.46 |
| 125 | Sinapine                      | 2.72 | 1.44 |
| 126 | 3-Dehydroquinone              | 2.65 | 1.41 |
| 127 | N-Acetylserotonin             | 2.62 | 1.39 |
| 128 | 4-Maleylacetoacetate          | 2.62 | 1.39 |
| 129 | 4-Fumarylacetoacetate         | 2.62 | 1.39 |
| 130 | Sinapate                      | 2.58 | 1.37 |
| 131 | Tyramine                      | 2.53 | 1.34 |
| 132 | Pyridoxine phosphate          | 2.52 | 1.33 |
| 133 | 1,3,7-Trimethylurate          | 2.51 | 1.33 |
| 134 | 1,7-Dimethyluric acid         | 2.49 | 1.32 |
| 135 | (Z)-3-Hexen-1-ol acetate      | 2.49 | 1.31 |
| 136 | (-)-Jasmonic acid             | 2.48 | 1.31 |
| 137 | 3-Hexenol                     | 2.46 | 1.30 |
| 138 | Canthaxanthin                 | 2.46 | 1.30 |
| 139 | Quercetin-3-O-glucoside       | 2.45 | 1.29 |
| 140 | beta-Caryophyllene            | 2.41 | 1.27 |
| 141 | 5Z-Dodecenoic acid            | 2.39 | 1.26 |
| 142 | 3-Fumarylpyruvate             | 2.39 | 1.26 |
| 143 | 2-Isopropylmaleate            | 2.34 | 1.22 |
| 144 | 1-Methyluric acid             | 2.33 | 1.22 |
| 145 | Indole-3-acetamide            | 2.33 | 1.22 |
| 146 | Diaminopimelic acid           | 2.32 | 1.21 |
| 147 | 3-Isopropylmalate             | 2.31 | 1.21 |
| 148 | 3,7,4'-Tri-O-methylquercetin  | 2.24 | 1.17 |
| 149 | p-Coumaroylagmatine           | 2.23 | 1.16 |

|     |                                    |      |       |
|-----|------------------------------------|------|-------|
| 150 | 5-Amino-6-(1-D-ribitylamino)uracil | 2.23 | 1.16  |
| 151 | Homogentisate                      | 2.22 | 1.15  |
| 152 | 4-Aminobenzoate                    | 2.21 | 1.15  |
| 153 | OPC-8:0                            | 2.19 | 1.13  |
| 154 | (S)-1-Pyrroline-5-carboxylate      | 2.19 | 1.13  |
| 155 | 3,4-Dihydroxyphenylacetaldehyde    | 2.15 | 1.11  |
| 156 | L-Glutamic acid                    | 2.13 | 1.09  |
| 157 | (2S)-2-Isopropyl-3-oxosuccinate    | 2.10 | 1.07  |
| 158 | 6,7-Dimethyl-8-(D-ribityl)lumazine | 2.06 | 1.04  |
| 159 | 6-Deoxytyphasterol                 | 2.05 | 1.04  |
| 160 | Hydroxyproline                     | 2.04 | 1.03  |
| 161 | D-Citramalate                      | 2.01 | 1.01  |
| 162 | Citraconate                        | 0.40 | -1.32 |
| 163 | Thiamin diphosphate                | 0.32 | -1.64 |
